# Supplementary material for: Synthesis, characterization and dye adsorption property of a 2D nickel(ii)-coordination polymer constructed from tetracarboxylic acid and 1,3-bis(imidazol-1-yl-methyl)benzene
Source: Royal Society of Chemistry journal article supplement (doi:10.1039/d2ce00897a), 2022-01-01
Supplement: d2ce00897a1.pdf [file d2ce00897a1.pdf]

**Synthesis, characterization and dye adsorption property of a 2D nickel(II)-coordination polymer constructed from tetracarboxylic acid and 1,3-bis(imidazol-1-yl-methyl)benzene**

**Esengül Çiftçi<sup>a</sup>, Tuğba Alp Arıcı<sup>b</sup>, Mürsel Arıcı<sup>a</sup>, Hakan Erer<sup>a</sup>, and Okan Zafer Yeşilel<sup>a,\*</sup>**

<sup>a</sup>Department of Chemistry, Faculty of Science, Eskişehir Osmangazi University, 26040 Eskişehir, Türkiye

<sup>b</sup>Department of Chemical Technology, Emet Vocational School, Kütahya Dumlupınar University, 43700 Kütahya, Türkiye

**Table S1.** Selected bond distances and angles for complex **1** (Å, °)

| <b>Bond Lengths (Å)</b>                                                                     |             |                                        |             |
|---------------------------------------------------------------------------------------------|-------------|----------------------------------------|-------------|
| Ni1–O1                                                                                      | 1.9690 (14) | Ni1–N4 <sup>i</sup>                    | 2.0322 (17) |
| Ni1–O4 <sup>iii</sup>                                                                       | 2.1140 (14) | Ni1–N1                                 | 2.0117 (17) |
| Ni1–O3 <sup>iii</sup>                                                                       | 2.1058 (14) |                                        |             |
| <b>Bond Angles (°)</b>                                                                      |             |                                        |             |
| O1–Ni1–O4 <sup>iii</sup>                                                                    | 98.43 (6)   | N4 <sup>i</sup> –Ni1–O4 <sup>iii</sup> | 105.63 (7)  |
| O1–Ni1–O3 <sup>iii</sup>                                                                    | 160.22 (6)  | N4 <sup>i</sup> –Ni1–O3 <sup>iii</sup> | 97.24 (7)   |
| O1–Ni1–N4 <sup>i</sup>                                                                      | 91.84 (6)   | N1–Ni1–O4 <sup>iii</sup>               | 148.17 (6)  |
| O1–Ni1–N1                                                                                   | 103.11 (7)  | N1–Ni1–O3 <sup>iii</sup>               | 93.24 (6)   |
| O3 <sup>iii</sup> –Ni1–O4 <sup>iii</sup>                                                    | 62.23 (5)   | N1–Ni1–N4 <sup>i</sup>                 | 96.89 (7)   |
| Symmetry codes: (i) $x, -y+1/2, z-1/2$ ; (ii) $-x+2, -y+1, -z$ ; (iii) $x, -y+1/2, z+1/2$ . |             |                                        |             |

**Table S2.** Parameters of isotherm models for MB adsorption.

| <b>Langmuir model</b>         |                                    |                       |       | <b>Freundlich model</b> |                               |       |
|-------------------------------|------------------------------------|-----------------------|-------|-------------------------|-------------------------------|-------|
| $K_L$<br>(L g <sup>-1</sup> ) | $q_{max}$<br>(mg g <sup>-1</sup> ) | $R_L$                 | $R^2$ | $n$                     | $K_F$<br>(L g <sup>-1</sup> ) | $R^2$ |
| 2.00×10 <sup>-2</sup>         | 194.67                             | 9.10×10 <sup>-2</sup> | 0.996 | 2.26                    | 14.47                         | 0.894 |

**Table S3.** Comparison of maximum adsorption capacities of MB for various CPs.

| <b>Adsorbent</b>                               | <b><math>q_m</math> (mg g<sup>-1</sup>)</b> | <b>Reference</b>  |
|------------------------------------------------|---------------------------------------------|-------------------|
| MoS <sub>2</sub> -COOH@ UiO-66-NH <sub>2</sub> | 253.00                                      | 1                 |
| UiO-66-(OH) <sub>2</sub> /GO                   | 96.69                                       | 2                 |
| Co doped Fe-BDC MOF                            | 23.92                                       | 3                 |
| UiO-66                                         | 107.00                                      | 4                 |
| Cu(I)-MOF                                      | 149.50                                      | 5                 |
| FMDC(1.0)                                      | 625.0                                       | 6                 |
| CP1 and CP2                                    | 45.15, 48.11                                | 7                 |
| Co(II)-CP                                      | 473.57                                      | 8                 |
| <b>Compound 1</b>                              | 194.67                                      | <i>This study</i> |

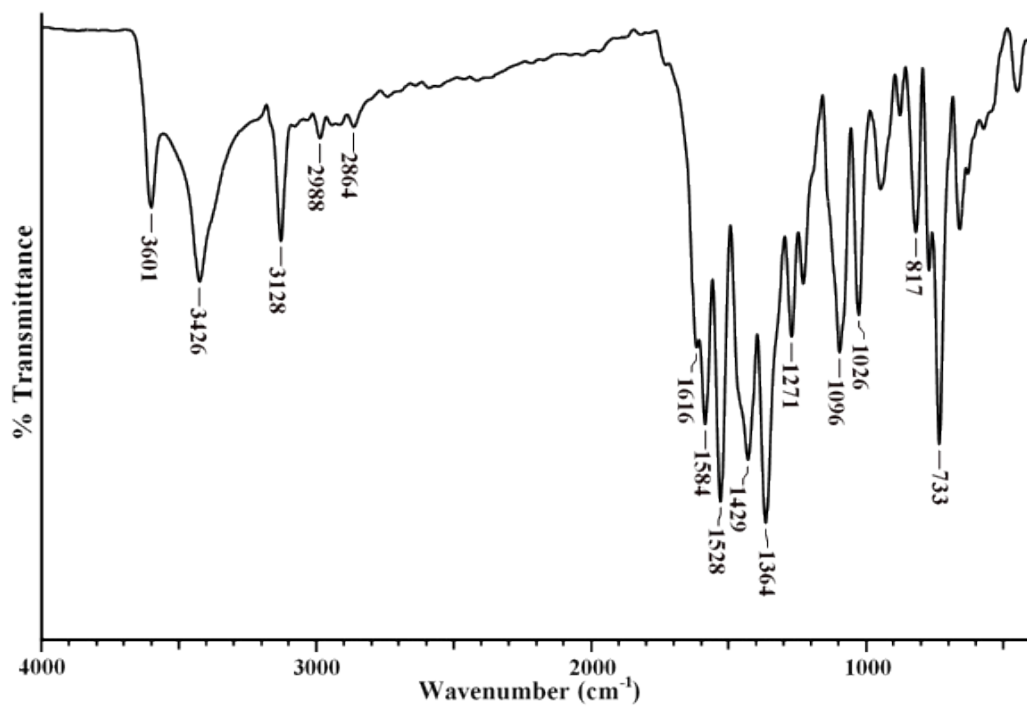

**Fig. S1.** IR spectrum of compound 1

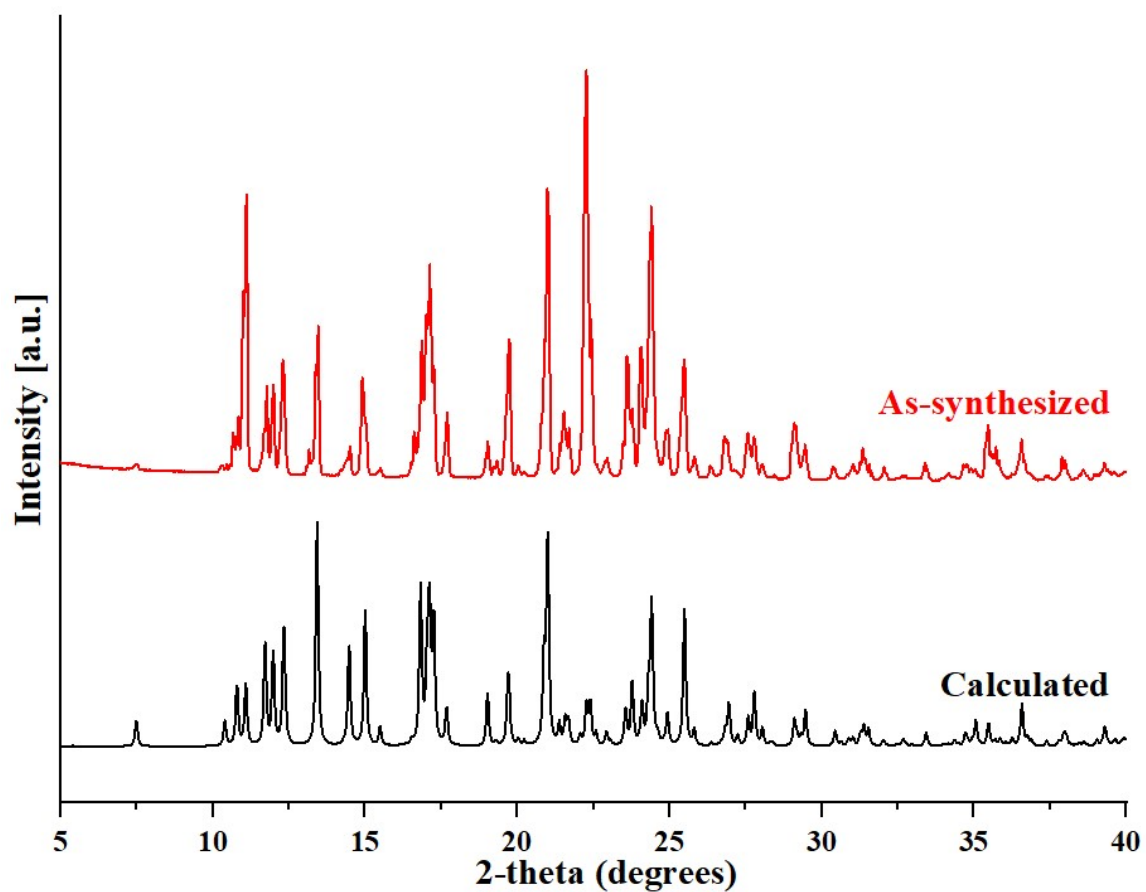

**Fig S2.** Simulated and experimental PXRD patterns of compound 1

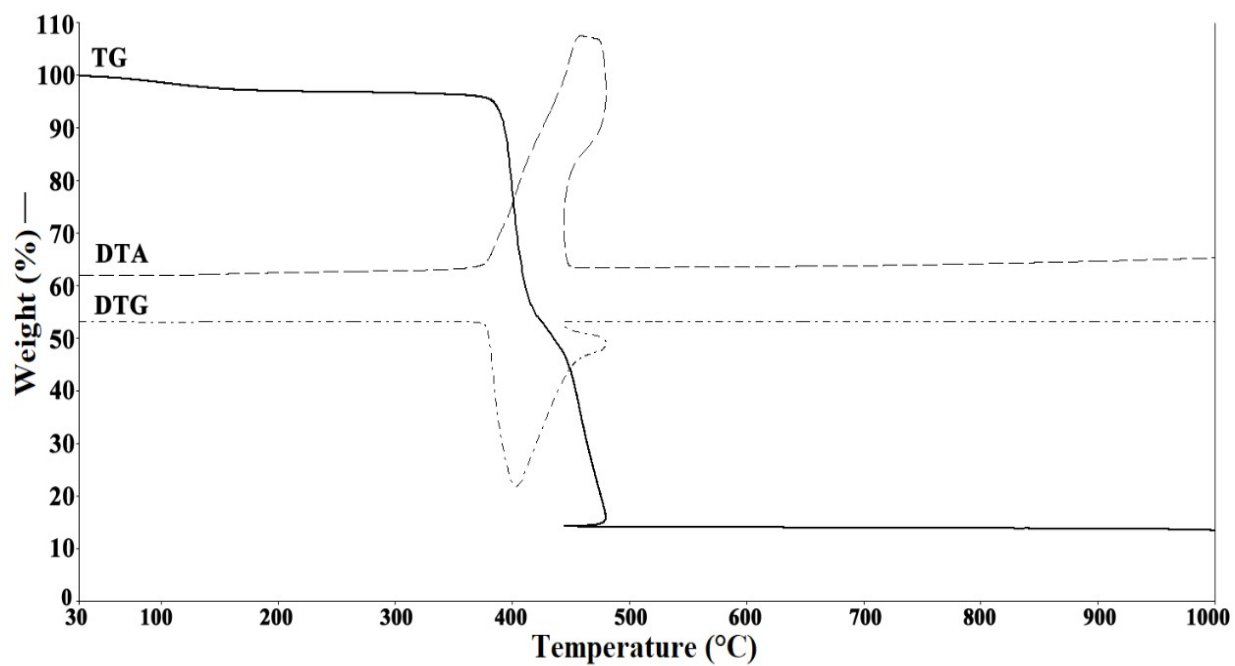

**Fig S3.** TG, DTA and DTG curves of compound **1**

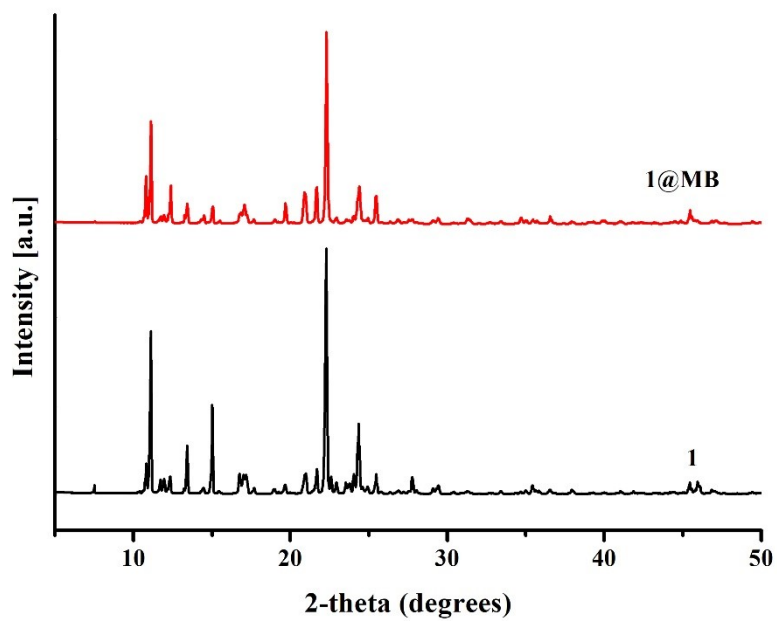

**Fig. S4.** PXRD patterns of as-synthesized compound and dye loaded compound **1**



## References

- 1 K. Karami, P. Bayat, S. Javadian and M. Saraji, *J. Mol. Liq.*, 2021, **342**, 117520.
- 2 Y. Sun, M. Chen, H. Liu, Y. Zhu, D. Wang and M. Yan, *Appl. Surf. Sci.*, 2020, **525**, 146614.
- 3 S. Soni, P. K. Bajpai, J. Mittal and C. Arora, *J. Mol. Liq.*, 2020, **314**, 113642.
- 4 M. R. Azhar, H. R. Abid, H. Sun, V. Periasamy, M. O. Tadé and S. Wang, *J. Colloid Interface Sci.*, 2017, **490**, 685–694.
- 5 Y.-T. Yang, C.-Z. Tu, J.-Y. Shi, X.-L. Yang, J.-J. Liu and F.-X. Cheng, *J. Solid State Chem.*, 2022, **311**, 123133.
- 6 M. A. Hossain, M. M. H. Mondol and S. H. Jhung, *Chemosphere*, 2022, **303**, 134890.
- 7 M. S. Ahmad, M. Khalid, M. S. Khan, M. Shahid and M. Ahmad, *CrystEngComm*, 2021, **23**, 6253–6266.
- 8 E. Çiftçi, T. A. Arıcı, M. Arıcı, H. Erer and O. Z. Yeşilel, *J. Solid State Chem.*, 2022, **311**, 123111.
